# Supplementary material for: Analysis of the Effects of Uncertainty, Risk-Pooling, and Subcontracting Mechanisms on Project Performance
Source: Atypon-hosted journal article supplement (doi:10.1287/opre.48.6.927.12398), 2000-12-01
Supplement: opre.48.6.927-sm.pdf [file opre.48.6.927-sm.pdf]

# Online Companion for

“Analysis of the Effects of Uncertainty, Risk-pooling and  
Subcontracting Mechanisms on Project Performance”

Operations Research  
Volume 48, Number 6, November 2000

Genero Gutierrez  
McCombs School of Business  
University of Texas

Anand Paul  
Warrington College of Business  
University of Florida

# 1 Appendix

## 1.1 Proof of Theorem 2

Let  $\{x_1, x_2, x_3\}$  be the support of each of the random variables and assume that  $x_1 < x_2 < x_3$  without any loss in generality.

**Theorem 2**(i) *Suppose  $\text{Supp}(\cdot) = \mathcal{S}$  and  $E(X) = E(\hat{X})$ . Then  $\text{Var}(\hat{X}) \geq \text{Var}(X)$  implies  $E(\hat{Z}) \geq E(Z)$ .*

(ii) *Given any integer  $N$  greater than 3, there exist random variables  $X_N, \hat{X}_N$  and  $Y_N$  defined on a support of  $N$  points such that  $E(\hat{X}_N) = E(X_N)$ ,  $\text{Var}(\hat{X}_N) > \text{Var}(X_N)$  and  $E(\hat{Z}_N) < E(Z_N)$ .*

**Proof:**(i) Since the mean is just a weighted sum of  $x_1, x_2$ , and  $x_3$ , it follows that for  $\hat{X}$  there must be less weight (probability) attached to  $x_2$  and more weight attached to  $x_1$  and  $x_3$ , compared with  $X$ . Now it follows from Fact 2 in Section 3 (by considering the distribution functions of  $X$  and  $\hat{X}$ ) that  $\hat{X} \geq_{cx} X$ . Hence, by Theorem 1, it follows that  $E(\hat{Z}) \geq E(Z)$ .

(ii) We know the claim is true for  $N = 4$  by the Counterexample to Sconberger's claim in Section 3. Suppose the claim is true for  $N = k$ . Then, by adding one point carrying a sufficiently small probability to the support, it follows that the claim is true for  $N = k + 1$ . Hence, the claim is true for all integral  $N$  greater than or equal to 4.  $\square$

## 1.2 Proof of Proposition 4

We treat the case when there are two contractors and two serial subprojects and show that the results obtained in Section 5 under the assumption of constant probabilities carry over to the case when the win probabilities are realizations of a random vector  $(P_1, P_2)$  with some distribution  $H$ . In the case of Splitting, let the realizations be  $p_1, p_2$  for subproject 1 and  $q_1, q_2$  for subproject 2. Let the realizations be  $r_1, r_2$  in the case of Pooling. Forming the MGFs and differentiating in a parallel fashion to that in Section 5, we obtain the *conditional* expectation of project completion time in the case of Splitting to be  $q_1\mu_1^2 + q_2\mu_2^2 + p_1\mu_1^1 + p_2\mu_2^1$ . Unconditioning and letting  $E_P$  denote the mean of  $P_1$  (and therefore  $1 - E_P$  the mean of  $P_2$ ), we obtain  $\dot{F}(0) = E_P\{(\mu_1^2 + \mu_1^1) - (\mu_2^2 + \mu_2^1)\}$ . A little algebra shows that the expected *conditional* project

completion time in the case of Pooling works out to  $r_1(\mu_1^2 + \mu_1^1) + r_2(\mu_2^2 + \mu_2^1)$ . Unconditioning, we obtain  $\dot{G}(0) = \dot{F}(0)$ .

Differentiating once more and unconditioning, we obtain:

$$\ddot{F}(0) = 2(E_P\mu_1^1 + (1 - E_P)\mu_2^1)(E_P\mu_1^2 + (1 - E_P)\mu_2^2) + E_P(\phi_1^1 + \phi_1^2) + (1 - E_P)(\phi_2^2 + \phi_2^1) \text{ and}$$

$$\ddot{G}(0) = E_P(2\mu_1^1\mu_1^2 + \phi_1^1 + \phi_1^2) + (1 - E_P)(2\mu_2^1\mu_2^2 + \phi_2^2 + \phi_2^1).$$

Now a little algebra shows that  $\ddot{F}(0) \leq \ddot{G}(0)$  if the mean completion times of the contractors are ordered.

Recall the conditional variance formula:  $Var(X) = E[Var(X/Y)] + Var(E[X/Y])$ . Now  $\ddot{F}(0) - [\dot{F}(0)]^2$  represents the first term of the conditional variance formula; likewise for  $G$ . We need to compute the second term to compare the variance of completion time under Splitting and Pooling.

For Splitting, the second term is  $\{(\mu_1^2)^2 + (\mu_2^2)^2 + (\mu_1^1)^2 + (\mu_2^1)^2\}\{Var(P)\}$ . For Pooling, the second term is  $\{(\mu_1^2 + \mu_1^1)^2 + (\mu_2^2 + \mu_2^1)^2\}\{Var(P)\}$ , which is identically larger than the second term under Splitting.

Thus, if the mean completion times of the contractors are ordered (or equivalently, if the contractors are consistent), Splitting and Pooling result in the same mean completion time but the variance of completion time under Splitting is smaller.  $\square$

### 1.3 Proof of Proposition 5

The following simple counter-example with 2 contractors and a 2-activity parallel project substantiates the claim.

We have:  $w = p \max(X_1, Y_1) + (1 - p) \max(X_2, Y_2)$  and

$$v = p^2 \max(X_1, Y_1) + (1 - p)^2 \max(X_2, Y_2) + p(1 - p)[\max(X_1, Y_2) + \max(X_2, Y_1)]$$

We define our random variables as follows:

$$X_1 = 10 \text{ w.p. } \frac{1}{2} \text{ and } 20 \text{ w.p. } \frac{1}{2}$$

$$X_2 = 10 \text{ w.p. } \frac{1}{2} \text{ and } 30 \text{ w.p. } \frac{1}{2}$$

$$Y_1 = 10 \text{ w.p. } 1$$

$$Y_2 = 25 \text{ w.p. } 1$$

Clearly,  $X_2$  is stochastically greater than  $X_1$  and  $Y_2$  is stochastically greater than  $Y_1$  and hence

the contractors are pointwise consistent.

$$Z_1 = \max(X_1, Y_1) = 10 \text{ w.p. } \frac{1}{2} \text{ and } 20 \text{ w.p. } \frac{1}{2}$$

$$Z_2 = \max(X_2, Y_2) = 25 \text{ w.p. } \frac{1}{2} \text{ and } 30 \text{ w.p. } \frac{1}{2}$$

$$\xi = \max(X_1, Y_2) = 25 \text{ w.p. } 1$$

$$\phi = \max(X_2, Y_1) = 10 \text{ w.p. } \frac{1}{2} \text{ and } 30 \text{ w.p. } \frac{1}{2}$$

$$\bar{Z}_1 = 15; \bar{Z}_2 = 55/2; \bar{\xi} = 25; \bar{\phi} = 20.$$

$$Var(Z_1) = 25; Var(Z_2) = 6.25; Var(\xi) = 0; Var(\phi) = 100.$$

$$Cov(Z_1, \xi) = Cov(Z_2, \xi) = 0 \text{ since } Var(\xi) = 0.$$

It can be verified that  $Pr(Z_1 = a, \phi = b) = 1/4$  for all 4 possible combinations of values of  $a$  and  $b$  and consequently we have  $Cov(Z_1, \phi) = 0$ .

To compute  $Cov(Z_2, \phi)$  we need the joint density function of  $Z_2$  and  $\phi$ .

$$\begin{aligned} P(Z_2 = 25; \phi = 10) &= P(\max(X_2, Y_2) = 25; \max(X_2, Y_1) = 10) \\ &= P(\max(X_2, Y_2) = 25; X_2 = 10) \\ &= P(\max(10, Y_2) = 25; X_2 = 10) \\ &= P(X_2 = 10) \\ &= \frac{1}{2}. \end{aligned}$$

$$P(Z_2 = 25; \phi = 30) = P(X_2 = 10; \max(X_2, Y_1) = 30) = 0$$

$$P(Z_2 = 30; \phi = 10) = P(X_2 = 30; \max(X_2, Y_1) = 10) = 0$$

$$P(Z_2 = 30; \phi = 30) = P(X_2 = 30; \max(X_2, Y_1) = 30) = 1/2$$

$$Cov(Z_2, \phi) = E(Z_2\phi) - E(Z_2)E(\phi) = 25$$

$$Var(w) = p^2Var(Z_1) + (1-p)^2Var(Z_2) = 25p^2 + \frac{25}{4}(1-p)^2$$

$$Var(v) = (25)p^4 + (1-p)^4\frac{25}{4} + 100p^2(1-p)^2 + 2p(1-p)^3 \cdot 25$$

$$Var(w) - Var(v) = 25[4p^2 + (1-p)^2 - 4p^4 - (1-p)^4 - 16p^2(1-p)^2 - 8p(1-p)^3] = 25f(p)$$

$$\text{Simplifying, } f(p) = -6p + 7p^2 + 12p^3 - 13p^4$$

$$f(1/2) = -9/16 \text{ while } f(0.8) = 0.4992$$

This proves the claim.  $\square$

## 1.4 Counterexample for Property 3 of associated random variables (page 24)

Let  $W, X, Y$  and  $Z$  be random variables with the following marginal and joint distributions ( $t$  and  $s$  are as yet unspecified real variables ) :

$$x \quad Pr(X = x) \quad y \quad Pr(Y = y) \quad z \quad Pr(Z = z)$$

$$1 \quad 1/3 \quad 2 \quad 1/3 \quad 3 \quad 1/3$$

$$2 \quad 1/3 \quad 3 \quad 1/3 \quad s \quad 1/3$$

$$t \quad 1/3 \quad 4 \quad 1/3 \quad 4 \quad 1/3$$

$$Pr(X = 1, Y = 2, Z = 3) = 1/3$$

$$Pr(X = 2, Y = 3, Z = s) = 1/3$$

$$Pr(X = t, Y = 4, Z = 4) = 1/3$$

We have, by direct computation,:

$$Cov(X, Y) = (t - 1)/3; \quad Cov(Y, Z) = 1/3; \quad Cov(X, Z) = (3s + 19t - 12 - st)/9 \text{ while}$$

$$E(XYZ) - E(X)E(Y)E(Z) = (3s + 9t - 15 - st)/3$$

Now setting  $s$  to 0 and  $t$  to any value between 1 and 15/9 forces  $E(XYZ) - E(X)E(Y)E(Z)$  to a negative value and this implies, by taking the contrapositive of the statement of the theorem above, that  $X, Y$  and  $Z$  cannot be associated random variables. On the other hand, each of the three pairwise covariances remains positive. This justifies statement (3).
